# Supplementary material
Source: publisher figshare collection journal article supplement (https://acs.figshare.com/ndownloader/files/5069995)
Supplement: Supplementary file 1 [file 5069995]

  
data_rycc 
  
_audit_creation_method            SHELXL-97 
_chemical_name_systematic 
; 
 ? 
; 
_chemical_name_common             ? 
_chemical_melting_point           ? 
_chemical_formula_moiety          ? 
_chemical_formula_sum 
 'C25 H31 N O5 S' 
_chemical_formula_weight          457.57 
  
loop_ 
 _atom_type_symbol 
 _atom_type_description 
 _atom_type_scat_dispersion_real 
 _atom_type_scat_dispersion_imag 
 _atom_type_scat_source 
 'C'  'C'   0.0033   0.0016 
 'International Tables Vol C Tables 4.2.6.8 and 6.1.1.4' 
 'H'  'H'   0.0000   0.0000 
 'International Tables Vol C Tables 4.2.6.8 and 6.1.1.4' 
 'N'  'N'   0.0061   0.0033 
 'International Tables Vol C Tables 4.2.6.8 and 6.1.1.4' 
 'O'  'O'   0.0106   0.0060 
 'International Tables Vol C Tables 4.2.6.8 and 6.1.1.4' 
 'S'  'S'   0.1246   0.1234 
 'International Tables Vol C Tables 4.2.6.8 and 6.1.1.4' 
  
_symmetry_cell_setting            Orthorhombic 
_symmetry_space_group_name_H-M    P2(1)2(1)2(1) 
  
loop_ 
 _symmetry_equiv_pos_as_xyz 
 'x, y, z' 
 '-x+1/2, -y, z+1/2' 
 '-x, y+1/2, -z+1/2' 
 'x+1/2, -y+1/2, -z' 
  
_cell_length_a                    11.436(2) 
_cell_length_b                    11.652(2) 
_cell_length_c                    19.448(4) 
_cell_angle_alpha                 90.00 
_cell_angle_beta                  90.00 
_cell_angle_gamma                 90.00 
_cell_volume                      2591.5(9) 
_cell_formula_units_Z             4 
_cell_measurement_temperature     296(2) 
_cell_measurement_reflns_used     3851 
_cell_measurement_theta_min       2.5 
_cell_measurement_theta_max       24.5 
  
_exptl_crystal_description        Parallelepiped 
_exptl_crystal_colour             Colorless 
_exptl_crystal_size_max           0.23 
_exptl_crystal_size_mid           0.15 
_exptl_crystal_size_min           0.12 
_exptl_crystal_density_meas       0 
_exptl_crystal_density_diffrn     1.173 
_exptl_crystal_density_method     'not measured' 
_exptl_crystal_F_000              976 
_exptl_absorpt_coefficient_mu     0.158 
_exptl_absorpt_correction_type    Empirical 
_exptl_absorpt_correction_T_min   0.9647 
_exptl_absorpt_correction_T_max   0.9813 
_exptl_absorpt_process_details    'SADABS (Sheldrick, 1999)' 
  
_exptl_special_details 
; 
 ? 
; 
  
_diffrn_ambient_temperature       296(2) 
_diffrn_radiation_wavelength      0.71073 
_diffrn_radiation_type            MoK\a 
_diffrn_radiation_source          'normal-focus sealed tube' 
_diffrn_radiation_monochromator   graphite 
_diffrn_measurement_device_type   'CCD area detector' 
_diffrn_measurement_method        'phi and omega scans' 
_diffrn_detector_area_resol_mean  ? 
_diffrn_standards_number          ? 
_diffrn_standards_interval_count  ? 
_diffrn_standards_interval_time   ? 
_diffrn_standards_decay_%         <1% 
_diffrn_reflns_number             19292 
_diffrn_reflns_av_R_equivalents   0.0581 
_diffrn_reflns_av_sigmaI/netI     0.0564 
_diffrn_reflns_limit_h_min        -13 
_diffrn_reflns_limit_h_max        13 
_diffrn_reflns_limit_k_min        -13 
_diffrn_reflns_limit_k_max        12 
_diffrn_reflns_limit_l_min        -23 
_diffrn_reflns_limit_l_max        23 
_diffrn_reflns_theta_min          2.04 
_diffrn_reflns_theta_max          25.00 
_reflns_number_total              4571 
_reflns_number_gt                 2906 
_reflns_threshold_expression      >2sigma(I) 
  
_computing_data_collection        'Bruker SMART' 
_computing_cell_refinement        'Bruker SMART' 
_computing_data_reduction         'Bruker SAINT+' 
_computing_structure_solution     'SHELXS-97 (Sheldrick, 1997)' 
_computing_structure_refinement   'SHELXL-97 (Sheldrick, 1997)' 
_computing_molecular_graphics     'Bruker SHELXTL' 
_computing_publication_material   'Bruker SHELXTL' 
  
_refine_special_details 
; 
 Refinement of F^2^ against ALL reflections.  The weighted R-factor wR and 
 goodness of fit S are based on F^2^, conventional R-factors R are based 
 on F, with F set to zero for negative F^2^. The threshold expression of 
 F^2^ > 2sigma(F^2^) is used only for calculating R-factors(gt) etc. and is 
 not relevant to the choice of reflections for refinement.  R-factors based 
 on F^2^ are statistically about twice as large as those based on F, and R- 
 factors based on ALL data will be even larger. 
; 
  
_refine_ls_structure_factor_coef  Fsqd 
_refine_ls_matrix_type            full 
_refine_ls_weighting_scheme       calc 
_refine_ls_weighting_details 
 'calc w=1/[\s^2^(Fo^2^)+(0.0580P)^2^+0.0000P] where P=(Fo^2^+2Fc^2^)/3' 
_atom_sites_solution_primary      direct 
_atom_sites_solution_secondary    difmap 
_atom_sites_solution_hydrogens    geom 
_refine_ls_hydrogen_treatment     riding 
_refine_ls_extinction_method      none 
_refine_ls_extinction_coef        ? 
_refine_ls_abs_structure_details 
 'Flack H D (1983), Acta Cryst. A39, 876-881' 
_refine_ls_abs_structure_Flack    -0.07(13) 
_refine_ls_number_reflns          4571 
_refine_ls_number_parameters      293 
_refine_ls_number_restraints      0 
_refine_ls_R_factor_all           0.1137 
_refine_ls_R_factor_gt            0.0686 
_refine_ls_wR_factor_ref          0.1398 
_refine_ls_wR_factor_gt           0.1236 
_refine_ls_goodness_of_fit_ref    1.079 
_refine_ls_restrained_S_all       1.079 
_refine_ls_shift/su_max           0.017 
_refine_ls_shift/su_mean          0.001 
  
loop_ 
 _atom_site_label 
 _atom_site_type_symbol 
 _atom_site_fract_x 
 _atom_site_fract_y 
 _atom_site_fract_z 
 _atom_site_U_iso_or_equiv 
 _atom_site_adp_type 
 _atom_site_occupancy 
 _atom_site_symmetry_multiplicity 
 _atom_site_calc_flag 
 _atom_site_refinement_flags 
 _atom_site_disorder_assembly 
 _atom_site_disorder_group 
S1 S 0.38781(10) 0.49173(11) 0.35038(5) 0.0728(3) Uani 1 1 d . . . 
O1 O 0.2921(3) 0.5547(3) 0.32441(15) 0.1005(11) Uani 1 1 d . . . 
O2 O 0.3757(3) 0.3739(3) 0.36755(15) 0.0982(10) Uani 1 1 d . . . 
O3 O 0.6590(4) 0.6545(3) 0.61265(19) 0.1248(14) Uani 1 1 d . . . 
O4 O 0.5061(4) 0.7695(3) 0.59881(17) 0.1033(11) Uani 1 1 d . . . 
O5 O 0.4634(2) 0.4956(2) 0.53346(11) 0.0593(6) Uani 1 1 d . . . 
N1 N 0.4287(3) 0.5572(3) 0.42047(14) 0.0576(8) Uani 1 1 d . . . 
C1 C 0.4192(4) 0.6782(4) 0.4250(2) 0.0677(12) Uani 1 1 d . . . 
H1B H 0.3601 0.7144 0.4003 0.081 Uiso 1 1 calc R . . 
C2 C 0.4896(5) 0.7414(4) 0.4621(2) 0.0803(13) Uani 1 1 d . . . 
H2B H 0.4736 0.8194 0.4659 0.096 Uiso 1 1 calc R . . 
C3 C 0.5933(4) 0.6953(4) 0.4985(2) 0.0776(13) Uani 1 1 d . . . 
H3A H 0.6592 0.7437 0.4843 0.093 Uiso 1 1 calc R . . 
C4 C 0.6220(3) 0.5751(4) 0.4733(2) 0.0749(12) Uani 1 1 d . . . 
H4A H 0.6595 0.5796 0.4287 0.090 Uiso 1 1 calc R . . 
H4B H 0.6762 0.5389 0.5050 0.090 Uiso 1 1 calc R . . 
C5 C 0.5127(3) 0.5034(3) 0.46787(17) 0.0551(9) Uani 1 1 d . . . 
H5A H 0.5327 0.4264 0.4513 0.066 Uiso 1 1 calc R . . 
C6 C 0.5895(6) 0.7020(5) 0.5761(3) 0.0865(15) Uani 1 1 d . . . 
C7 C 0.5035(8) 0.7884(7) 0.6725(3) 0.144(3) Uani 1 1 d . . . 
H7A H 0.5058 0.7156 0.6966 0.173 Uiso 1 1 calc R . . 
H7B H 0.5706 0.8336 0.6865 0.173 Uiso 1 1 calc R . . 
C8 C 0.3987(9) 0.8476(9) 0.6882(4) 0.211(4) Uani 1 1 d . . . 
H8A H 0.3989 0.8692 0.7358 0.253 Uiso 1 1 calc R . . 
H8B H 0.3330 0.7985 0.6792 0.253 Uiso 1 1 calc R . . 
H8C H 0.3931 0.9151 0.6601 0.253 Uiso 1 1 calc R . . 
C9 C 0.5037(4) 0.5031(4) 0.29184(18) 0.0645(10) Uani 1 1 d . . . 
C10 C 0.5224(5) 0.6015(5) 0.2566(3) 0.0970(17) Uani 1 1 d . . . 
H10A H 0.4748 0.6648 0.2646 0.116 Uiso 1 1 calc R . . 
C11 C 0.6108(6) 0.6088(5) 0.2093(3) 0.116(2) Uani 1 1 d . . . 
H11A H 0.6224 0.6765 0.1849 0.139 Uiso 1 1 calc R . . 
C12 C 0.6806(5) 0.5183(6) 0.1982(3) 0.1124(19) Uani 1 1 d . . . 
H12A H 0.7390 0.5230 0.1651 0.135 Uiso 1 1 calc R . . 
C13 C 0.6672(5) 0.4185(5) 0.2351(3) 0.1111(19) Uani 1 1 d . . . 
H13A H 0.7176 0.3568 0.2284 0.133 Uiso 1 1 calc R . . 
C14 C 0.5770(5) 0.4118(4) 0.2824(2) 0.0918(16) Uani 1 1 d . . . 
H14A H 0.5663 0.3450 0.3079 0.110 Uiso 1 1 calc R . . 
C15 C 0.3781(3) 0.4065(3) 0.5417(2) 0.0616(10) Uani 1 1 d . . . 
H15A H 0.3283 0.4056 0.5007 0.074 Uiso 1 1 calc R . . 
C16 C 0.3024(4) 0.4400(4) 0.6035(3) 0.0869(14) Uani 1 1 d . . . 
C17 C 0.2065(5) 0.3465(5) 0.6119(3) 0.141(3) Uani 1 1 d . . . 
H17A H 0.2426 0.2745 0.6230 0.169 Uiso 1 1 calc R . . 
H17B H 0.1637 0.3391 0.5696 0.169 Uiso 1 1 calc R . . 
H17C H 0.1540 0.3683 0.6481 0.169 Uiso 1 1 calc R . . 
C18 C 0.3729(6) 0.4527(5) 0.6685(2) 0.128(2) Uani 1 1 d . . . 
H18A H 0.4381 0.5027 0.6601 0.154 Uiso 1 1 calc R . . 
H18B H 0.4010 0.3788 0.6828 0.154 Uiso 1 1 calc R . . 
H18C H 0.3246 0.4848 0.7040 0.154 Uiso 1 1 calc R . . 
C19 C 0.2417(4) 0.5526(4) 0.5864(3) 0.1074(19) Uani 1 1 d . . . 
H19A H 0.2993 0.6098 0.5755 0.129 Uiso 1 1 calc R . . 
H19B H 0.1966 0.5774 0.6253 0.129 Uiso 1 1 calc R . . 
H19C H 0.1909 0.5418 0.5477 0.129 Uiso 1 1 calc R . . 
C21 C 0.4371(4) 0.2906(4) 0.5476(2) 0.0692(12) Uani 1 1 d . . . 
C22 C 0.3885(5) 0.1952(5) 0.5174(3) 0.1030(17) Uani 1 1 d . . . 
H22A H 0.3219 0.2025 0.4903 0.124 Uiso 1 1 calc R . . 
C23 C 0.4382(7) 0.0891(5) 0.5271(5) 0.159(3) Uani 1 1 d . . . 
H23A H 0.4031 0.0243 0.5083 0.191 Uiso 1 1 calc R . . 
C24 C 0.5383(8) 0.0782(7) 0.5641(5) 0.160(4) Uani 1 1 d . . . 
H24A H 0.5725 0.0063 0.5696 0.192 Uiso 1 1 calc R . . 
C25 C 0.5888(6) 0.1722(6) 0.5934(4) 0.135(2) Uani 1 1 d . . . 
H25A H 0.6564 0.1646 0.6196 0.161 Uiso 1 1 calc R . . 
C26 C 0.5393(5) 0.2780(4) 0.5839(3) 0.0892(15) Uani 1 1 d . . . 
H26A H 0.5756 0.3425 0.6023 0.107 Uiso 1 1 calc R . . 
  
loop_ 
 _atom_site_aniso_label 
 _atom_site_aniso_U_11 
 _atom_site_aniso_U_22 
 _atom_site_aniso_U_33 
 _atom_site_aniso_U_23 
 _atom_site_aniso_U_13 
 _atom_site_aniso_U_12 
S1 0.0664(7) 0.0911(9) 0.0610(6) -0.0104(7) 0.0006(6) -0.0112(7) 
O1 0.070(2) 0.155(3) 0.077(2) -0.020(2) -0.0159(17) 0.010(2) 
O2 0.118(3) 0.081(2) 0.095(2) -0.0168(17) 0.026(2) -0.048(2) 
O3 0.135(3) 0.131(3) 0.108(3) 0.011(2) -0.059(3) 0.004(3) 
O4 0.127(3) 0.106(3) 0.077(2) -0.010(2) -0.021(2) 0.003(3) 
O5 0.0650(16) 0.0599(15) 0.0532(14) 0.0096(15) 0.0073(12) -0.0029(16) 
N1 0.064(2) 0.058(2) 0.0510(18) 0.0025(15) 0.0053(16) 0.0037(16) 
C1 0.080(3) 0.071(3) 0.053(2) 0.006(2) -0.007(2) 0.015(2) 
C2 0.113(4) 0.052(3) 0.076(3) 0.008(2) -0.012(3) 0.004(3) 
C3 0.076(3) 0.064(3) 0.093(3) 0.020(3) -0.015(3) -0.016(3) 
C4 0.056(3) 0.085(3) 0.083(3) 0.022(3) 0.005(2) -0.005(3) 
C5 0.055(2) 0.050(2) 0.060(2) 0.002(2) 0.0053(18) 0.003(2) 
C6 0.091(4) 0.077(3) 0.091(4) 0.003(3) -0.026(4) -0.018(3) 
C7 0.178(7) 0.171(6) 0.084(4) -0.039(4) -0.021(4) 0.003(6) 
C8 0.195(9) 0.328(13) 0.111(6) -0.052(7) 0.013(6) 0.052(10) 
C9 0.076(3) 0.064(3) 0.053(2) 0.004(2) 0.0000(19) 0.000(3) 
C10 0.106(4) 0.098(4) 0.086(3) 0.033(3) 0.020(3) 0.033(3) 
C11 0.135(5) 0.101(5) 0.112(4) 0.048(4) 0.035(4) 0.008(4) 
C12 0.120(5) 0.126(5) 0.091(4) 0.018(4) 0.042(3) -0.006(5) 
C13 0.117(5) 0.097(4) 0.119(5) -0.009(4) 0.050(4) 0.012(4) 
C14 0.111(4) 0.078(4) 0.087(3) -0.002(3) 0.027(3) -0.008(3) 
C15 0.051(2) 0.066(3) 0.068(2) 0.025(2) 0.008(2) 0.001(2) 
C16 0.078(3) 0.086(3) 0.097(4) 0.036(3) 0.032(3) 0.017(3) 
C17 0.097(4) 0.121(5) 0.204(7) 0.067(5) 0.082(5) 0.027(4) 
C18 0.166(6) 0.156(5) 0.063(3) 0.029(3) 0.043(4) 0.046(4) 
C19 0.084(4) 0.092(4) 0.146(5) 0.011(4) 0.035(3) 0.027(3) 
C21 0.058(3) 0.059(3) 0.090(3) 0.022(2) 0.019(2) 0.004(2) 
C22 0.084(3) 0.069(4) 0.155(5) 0.009(3) 0.016(4) -0.013(3) 
C23 0.120(6) 0.065(5) 0.292(10) 0.009(5) 0.053(7) -0.003(4) 
C24 0.120(6) 0.087(5) 0.272(10) 0.060(6) 0.074(7) 0.049(5) 
C25 0.092(5) 0.103(5) 0.209(7) 0.045(5) 0.002(5) 0.032(4) 
C26 0.063(3) 0.080(3) 0.124(4) 0.030(3) 0.010(3) 0.012(3) 
  
_geom_special_details 
; 
 All esds (except the esd in the dihedral angle between two l.s. planes) 
 are estimated using the full covariance matrix.  The cell esds are taken 
 into account individually in the estimation of esds in distances, angles 
 and torsion angles; correlations between esds in cell parameters are only 
 used when they are defined by crystal symmetry.  An approximate (isotropic) 
 treatment of cell esds is used for estimating esds involving l.s. planes. 
; 
  
loop_ 
 _geom_bond_atom_site_label_1 
 _geom_bond_atom_site_label_2 
 _geom_bond_distance 
 _geom_bond_site_symmetry_2 
 _geom_bond_publ_flag 
S1 O1 1.411(3) . ? 
S1 O2 1.420(3) . ? 
S1 N1 1.631(3) . ? 
S1 C9 1.752(4) . ? 
O3 C6 1.201(6) . ? 
O4 C6 1.312(6) . ? 
O4 C7 1.450(6) . ? 
O5 C5 1.398(4) . ? 
O5 C15 1.433(4) . ? 
N1 C1 1.416(5) . ? 
N1 C5 1.472(4) . ? 
C1 C2 1.309(6) . ? 
C2 C3 1.482(6) . ? 
C3 C6 1.512(6) . ? 
C3 C4 1.521(6) . ? 
C4 C5 1.508(5) . ? 
C7 C8 1.416(10) . ? 
C9 C10 1.352(6) . ? 
C9 C14 1.367(6) . ? 
C10 C11 1.371(7) . ? 
C11 C12 1.340(7) . ? 
C12 C13 1.375(7) . ? 
C13 C14 1.384(7) . ? 
C15 C21 1.514(5) . ? 
C15 C16 1.531(6) . ? 
C16 C18 1.508(7) . ? 
C16 C19 1.522(6) . ? 
C16 C17 1.553(7) . ? 
C21 C26 1.373(6) . ? 
C21 C22 1.374(6) . ? 
C22 C23 1.374(8) . ? 
C23 C24 1.358(10) . ? 
C24 C25 1.363(10) . ? 
C25 C26 1.369(7) . ? 
  
loop_ 
 _geom_angle_atom_site_label_1 
 _geom_angle_atom_site_label_2 
 _geom_angle_atom_site_label_3 
 _geom_angle 
 _geom_angle_site_symmetry_1 
 _geom_angle_site_symmetry_3 
 _geom_angle_publ_flag 
O1 S1 O2 120.7(2) . . ? 
O1 S1 N1 106.16(18) . . ? 
O2 S1 N1 106.51(18) . . ? 
O1 S1 C9 108.3(2) . . ? 
O2 S1 C9 107.5(2) . . ? 
N1 S1 C9 106.89(18) . . ? 
C6 O4 C7 116.0(5) . . ? 
C5 O5 C15 115.0(3) . . ? 
C1 N1 C5 115.8(3) . . ? 
C1 N1 S1 119.7(3) . . ? 
C5 N1 S1 120.7(2) . . ? 
C2 C1 N1 123.2(4) . . ? 
C1 C2 C3 123.5(4) . . ? 
C2 C3 C6 115.7(5) . . ? 
C2 C3 C4 110.7(4) . . ? 
C6 C3 C4 112.0(4) . . ? 
C5 C4 C3 110.7(3) . . ? 
O5 C5 N1 109.6(3) . . ? 
O5 C5 C4 107.8(3) . . ? 
N1 C5 C4 110.4(3) . . ? 
O3 C6 O4 123.9(5) . . ? 
O3 C6 C3 123.2(6) . . ? 
O4 C6 C3 112.8(5) . . ? 
C8 C7 O4 107.7(6) . . ? 
C10 C9 C14 119.7(4) . . ? 
C10 C9 S1 120.9(4) . . ? 
C14 C9 S1 119.5(4) . . ? 
C9 C10 C11 120.6(5) . . ? 
C12 C11 C10 119.9(5) . . ? 
C11 C12 C13 121.0(5) . . ? 
C12 C13 C14 118.5(5) . . ? 
C9 C14 C13 120.1(5) . . ? 
O5 C15 C21 110.6(3) . . ? 
O5 C15 C16 106.7(3) . . ? 
C21 C15 C16 114.8(3) . . ? 
C18 C16 C19 110.0(5) . . ? 
C18 C16 C15 112.3(4) . . ? 
C19 C16 C15 107.9(4) . . ? 
C18 C16 C17 111.0(5) . . ? 
C19 C16 C17 107.8(4) . . ? 
C15 C16 C17 107.7(4) . . ? 
C26 C21 C22 118.5(4) . . ? 
C26 C21 C15 120.9(4) . . ? 
C22 C21 C15 120.6(4) . . ? 
C23 C22 C21 120.1(6) . . ? 
C24 C23 C22 120.4(7) . . ? 
C23 C24 C25 120.2(7) . . ? 
C24 C25 C26 119.5(7) . . ? 
C25 C26 C21 121.1(6) . . ? 
  
loop_ 
 _geom_torsion_atom_site_label_1 
 _geom_torsion_atom_site_label_2 
 _geom_torsion_atom_site_label_3 
 _geom_torsion_atom_site_label_4 
 _geom_torsion 
 _geom_torsion_site_symmetry_1 
 _geom_torsion_site_symmetry_2 
 _geom_torsion_site_symmetry_3 
 _geom_torsion_site_symmetry_4 
 _geom_torsion_publ_flag 
O1 S1 N1 C1 -33.9(4) . . . . ? 
O2 S1 N1 C1 -163.7(3) . . . . ? 
C9 S1 N1 C1 81.6(4) . . . . ? 
O1 S1 N1 C5 168.8(3) . . . . ? 
O2 S1 N1 C5 38.9(3) . . . . ? 
C9 S1 N1 C5 -75.7(3) . . . . ? 
C5 N1 C1 C2 8.3(6) . . . . ? 
S1 N1 C1 C2 -150.1(4) . . . . ? 
N1 C1 C2 C3 5.8(7) . . . . ? 
C1 C2 C3 C6 -115.4(5) . . . . ? 
C1 C2 C3 C4 13.4(6) . . . . ? 
C2 C3 C4 C5 -44.7(5) . . . . ? 
C6 C3 C4 C5 86.2(5) . . . . ? 
C15 O5 C5 N1 76.0(4) . . . . ? 
C15 O5 C5 C4 -163.7(3) . . . . ? 
C1 N1 C5 O5 78.4(4) . . . . ? 
S1 N1 C5 O5 -123.4(3) . . . . ? 
C1 N1 C5 C4 -40.2(4) . . . . ? 
S1 N1 C5 C4 118.0(3) . . . . ? 
C3 C4 C5 O5 -61.1(4) . . . . ? 
C3 C4 C5 N1 58.7(4) . . . . ? 
C7 O4 C6 O3 2.2(8) . . . . ? 
C7 O4 C6 C3 -174.7(5) . . . . ? 
C2 C3 C6 O3 169.5(5) . . . . ? 
C4 C3 C6 O3 41.3(6) . . . . ? 
C2 C3 C6 O4 -13.7(6) . . . . ? 
C4 C3 C6 O4 -141.8(4) . . . . ? 
C6 O4 C7 C8 -171.1(6) . . . . ? 
O1 S1 C9 C10 35.8(4) . . . . ? 
O2 S1 C9 C10 167.8(4) . . . . ? 
N1 S1 C9 C10 -78.2(4) . . . . ? 
O1 S1 C9 C14 -145.1(4) . . . . ? 
O2 S1 C9 C14 -13.1(4) . . . . ? 
N1 S1 C9 C14 100.9(4) . . . . ? 
C14 C9 C10 C11 3.0(8) . . . . ? 
S1 C9 C10 C11 -177.9(4) . . . . ? 
C9 C10 C11 C12 -0.8(9) . . . . ? 
C10 C11 C12 C13 -1.9(10) . . . . ? 
C11 C12 C13 C14 2.3(10) . . . . ? 
C10 C9 C14 C13 -2.5(7) . . . . ? 
S1 C9 C14 C13 178.4(4) . . . . ? 
C12 C13 C14 C9 -0.1(8) . . . . ? 
C5 O5 C15 C21 76.2(4) . . . . ? 
C5 O5 C15 C16 -158.2(3) . . . . ? 
O5 C15 C16 C18 -59.4(5) . . . . ? 
C21 C15 C16 C18 63.6(5) . . . . ? 
O5 C15 C16 C19 62.0(4) . . . . ? 
C21 C15 C16 C19 -175.0(4) . . . . ? 
O5 C15 C16 C17 178.1(4) . . . . ? 
C21 C15 C16 C17 -58.9(5) . . . . ? 
O5 C15 C21 C26 39.0(5) . . . . ? 
C16 C15 C21 C26 -81.9(5) . . . . ? 
O5 C15 C21 C22 -141.9(4) . . . . ? 
C16 C15 C21 C22 97.2(5) . . . . ? 
C26 C21 C22 C23 3.8(7) . . . . ? 
C15 C21 C22 C23 -175.3(5) . . . . ? 
C21 C22 C23 C24 -2.8(10) . . . . ? 
C22 C23 C24 C25 1.6(12) . . . . ? 
C23 C24 C25 C26 -1.4(11) . . . . ? 
C24 C25 C26 C21 2.5(9) . . . . ? 
C22 C21 C26 C25 -3.7(7) . . . . ? 
C15 C21 C26 C25 175.4(5) . . . . ? 
  
_diffrn_measured_fraction_theta_max    1.000 
_diffrn_reflns_theta_full              25.00 
_diffrn_measured_fraction_theta_full   1.000 
_refine_diff_density_max    0.200 
_refine_diff_density_min   -0.123 
_refine_diff_density_rms    0.034 
